# Supplementary material for: Incorporating Post-Cessation Weight-Control Coaching into Smoking Cessation Therapy to Reduce Type 2 Diabetes Risk
Source: MDPI journal article supplement (doi:10.3390/nu13103360), 2021-09-25
Supplement: s1 [file s1]

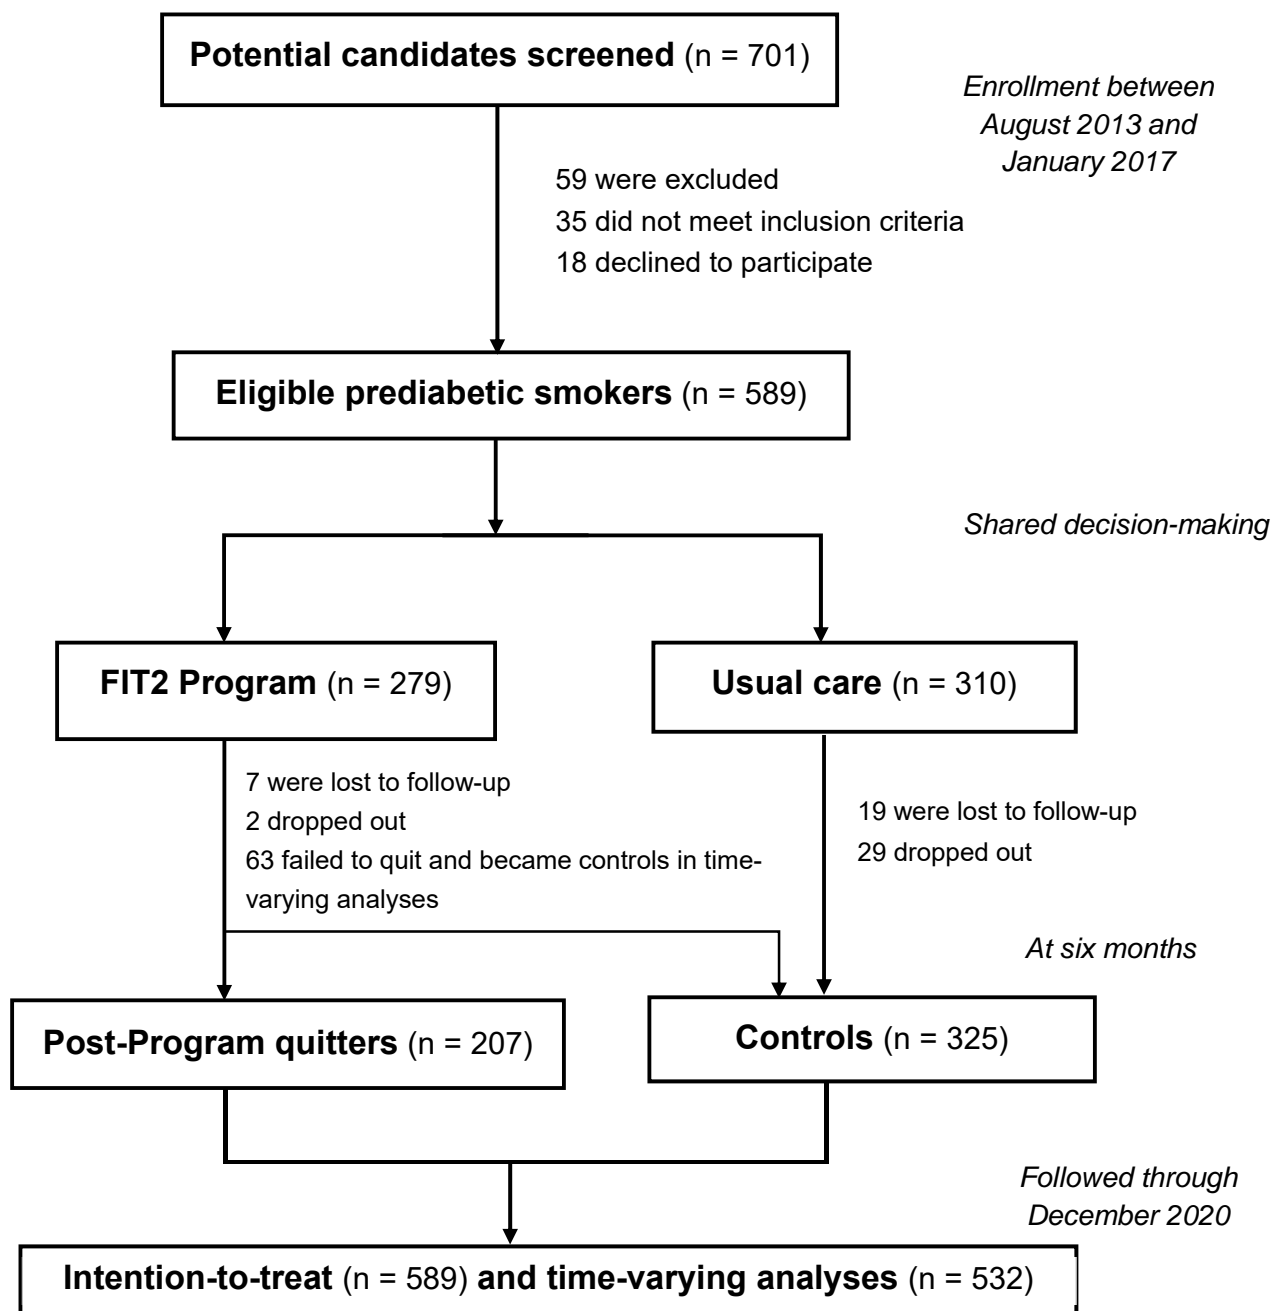

**Figure S1. Study flowchart**

The Fight Tobacco and Stay Fit (FIT2) program was a 16-week program including smoking cessation therapy with individualized behavior coaching in diet and physical activity for PCWG restriction. Post-program quitters were those who quit successfully after the intervention and maintained their non-smoking status at six months. The first six months experienced by all post-program quitters were considered time experienced by the controls in the time-varying analyses to reduce immortal time bias.

**Table S1. Baseline characteristics of participants (intention-to-treat analysis)**

|                                        | <b>FIT2 program<br/>(n = 279)</b> | <b>Usual care<br/>(n = 310)</b> | <b><i>P</i> value</b> |
|----------------------------------------|-----------------------------------|---------------------------------|-----------------------|
| Age                                    | 53.0 ± 10.5                       | 53.9 ± 9.4                      | 0.28                  |
| Male                                   | 232 (83.2)                        | 259 (83.6)                      | 0.90                  |
| Cigarette consumption (CPD)            | 18.4 ± 9.3                        | 17.8 ± 8.2                      | 0.39                  |
| Smoking duration (years)               | 27.5 ± 7.9                        | 26.7 ± 7.8                      | 0.18                  |
| FTND scores                            | 5.76 ± 2.06                       | 5.55 ± 2.03                     | 0.20                  |
| Body mass index (kg/m <sup>2</sup> )   | 26.0 ± 3.23                       | 26.4 ± 3.91                     | 0.17                  |
| HbA <sub>1c</sub> (mmol/mol)           | 43.4 ± 1.6                        | 43.3 ± 2.1                      | 0.52                  |
| HbA <sub>1c</sub> (%)                  | 6.12 ± 0.14                       | 6.11 ± 0.19                     | 0.52                  |
| Fasting glucose (mmol/l)               | 6.16 ± 0.34                       | 6.11 ± 0.39                     | 0.13                  |
| ALT (IU/L)                             | 46.7 ± 23.8                       | 48.5 ± 29.1                     | 0.41                  |
| eGFR (ml/min per 1.73 m <sup>2</sup> ) | 87.1 ± 14.0                       | 88.7 ± 11.8                     | 0.15                  |
| Hypertension                           | 161 (50.7)                        | 157 (57.7)                      | 0.09                  |
| Dyslipidemia                           | 193 (69.2)                        | 225 (72.6)                      | 0.36                  |
| Physically active                      | 82 (29.4)                         | 73 (23.6)                       | 0.11                  |
| Depression                             | 26 (9.4)                          | 29 (9.3)                        | 0.99                  |
| Sleep disturbance                      | 215 (77.1)                        | 240 (77.4)                      | 0.92                  |

Data are presented as numbers (percentages) or means ± standard deviations.

ALT, alanine aminotransferase; CPD, cigarettes per day; FTND, Fagerström Test for Nicotine Dependence; GFR, estimated glomerular filtration rate.

**Table S2. Characteristics of participants by different post-program abstinence statuses at six months (time-varying analysis)**

|                                        | <b>Post-program<br/>quitters (n = 207)</b> | <b>Controls<br/>(n = 325)</b> | <b><i>P</i> value</b> |
|----------------------------------------|--------------------------------------------|-------------------------------|-----------------------|
| Age                                    | 53.6 ± 10.5                                | 53.8 ± 9.4                    | 0.86                  |
| Male                                   | 177 (85.5)                                 | 274 (84.3)                    | 0.71                  |
| Cigarette consumption (CPD)            | 18.3 ± 9.6                                 | 17.9 ± 8.1                    | 0.59                  |
| Smoking duration (years)               | 27.3 ± 8.3                                 | 26.6 ± 7.7                    | 0.32                  |
| FTND scores                            | 5.71 ± 2.11                                | 5.58 ± 2.03                   | 0.49                  |
| Body mass index (kg/m <sup>2</sup> )   | 26.1 ± 2.8                                 | 26.5 ± 3.9                    | 0.18                  |
| HbA <sub>1c</sub> (mmol/mol)           | 43.3 ± 1.6                                 | 43.3 ± 2.1                    | 0.96                  |
| HbA <sub>1c</sub> (%)                  | 6.11 ± 0.14                                | 6.11 ± 0.19                   | 0.96                  |
| Fasting glucose (mmol/l)               | 6.18 ± 0.35                                | 6.11 ± 0.39                   | 0.06                  |
| ALT (IU/L)                             | 46.0 ± 23.8                                | 48.5 ± 28.8                   | 0.28                  |
| eGFR (ml/min per 1.73 m <sup>2</sup> ) | 87.6 ± 13.5                                | 88.5 ± 12.1                   | 0.46                  |
| Hypertension                           | 110 (53.1)                                 | 162 (49.9)                    | 0.46                  |
| Dyslipidemia                           | 145 (72.1)                                 | 242 (73.4)                    | 0.27                  |
| Physically active                      | 56 (27.1)                                  | 75 (23.1)                     | 0.30                  |
| Depression                             | 26 (12.6)                                  | 29 (8.9)                      | 0.18                  |
| Sleep disturbance                      | 157 (75.9)                                 | 250 (76.9)                    | 0.78                  |

Data are presented as numbers (percentages) or means ± standard deviations.

ALT, alanine aminotransferase; CPD, cigarettes per day; FTND, Fagerström Test for Nicotine Dependence; GFR, estimated glomerular filtration rate.

**Table S3. Multiple linear regression analyses of HbA<sub>1c</sub> changes at 6 and 12 months in prediabetic smokers**

|                                       | <b>Intention-to-treat analysis (n = 589)</b> |                                       |
|---------------------------------------|----------------------------------------------|---------------------------------------|
|                                       | HbA <sub>1c</sub> change at 6 months         | HbA <sub>1c</sub> change at 12 months |
| Baseline HbA <sub>1c</sub> (mmol/mol) | 0.01 (0.04)                                  | 0.19 (0.09) <sup>*</sup>              |
| Body mass index (kg/m <sup>2</sup> )  | 0.05 (0.02) <sup>*</sup>                     | 0.16 (0.05) <sup>***</sup>            |
| Weight gain at 6 months (kg)          | 0.24 (0.05) <sup>***</sup>                   | 0.67 (0.11) <sup>***</sup>            |
| Physically active (vs. inactive)      | -0.21 (0.15)                                 | -1.00 (0.31) <sup>**</sup>            |
| Depression (vs. no)                   | 0.38 (0.22)                                  | 0.02 (0.47)                           |
| FIT2 program (vs. usual care)         | -0.10 (0.16)                                 | -1.33 (0.33) <sup>***</sup>           |
|                                       | <b>Time-varying analysis (n = 532)</b>       |                                       |
|                                       | HbA <sub>1c</sub> change at 6 months         | HbA <sub>1c</sub> change at 12 months |
| Baseline HbA <sub>1c</sub> (mmol/mol) | 0.05 (0.05)                                  | 0.29 (0.09) <sup>**</sup>             |
| Body mass index (kg/m <sup>2</sup> )  | 0.07 (0.02) <sup>**</sup>                    | 0.18 (0.05) <sup>***</sup>            |
| Weight gain at 6 months (kg)          | 0.17 (0.05) <sup>**</sup>                    | 0.51 (0.11) <sup>***</sup>            |
| Physically active (yes vs. inactive)  | -0.15 (0.16)                                 | -0.53 (0.32)                          |
| Depression (vs. no)                   | 0.39 (0.22)                                  | 0.13 (0.45)                           |
| Post-program abstinence (vs. control) | -0.03 (0.17)                                 | -1.13 (0.34) <sup>**</sup>            |

Data are presented as  $\beta$  (SE), adjusted for age, sex, alanine aminotransferase, estimated glomerular filtration rate, hypertension, dyslipidemia, and sleep disturbance. <sup>\*</sup>  $P < 0.05$ ; <sup>\*\*</sup>  $P < 0.01$ ; <sup>\*\*\*</sup>  $P < 0.001$ .

**Table S4. Association of post-cessation weight gain degree at 6 months with incident type 2 diabetes among post-program quitters (n=207)**

|                       | <b>Unadjusted analysis</b> | <b>Adjusted analysis <sup>a</sup></b> |
|-----------------------|----------------------------|---------------------------------------|
| PCWG <1 kg (n=69)     | Referent                   | Referent                              |
| PCWG 1 to 2 kg (n=57) | 2.85 (0.74–11.0)           | 1.36 (0.31–5.97)                      |
| PCWG ≥2 kg (n=81)     | 31.5 (9.83–101) **         | 10.0 (2.11–47.5) *                    |
| <i>P</i> for trend    | <0.0001                    | 0.010                                 |

Data are presented as hazard ratios (95% CIs). <sup>a</sup> Adjusted for age, sex, body mass index, post-program abstinence, alanine aminotransferase, estimated glomerular filtration rate, hypertension, dyslipidemia, physical activity, depression, and sleep disturbance. PCWG, post-cessation weight gain. \**P*<0.05; \*\**P*<0.01.
